# Supplementary material
Source: MDPI journal article supplement (https://www.mdpi.com/2072-4292/14/4/878)
Supplement: s1 [file s1]

# Frequency domain electromagnetic mapping of an abandoned waste-disposal site: a case in Sardinia (Italy)

## Supplementary Material

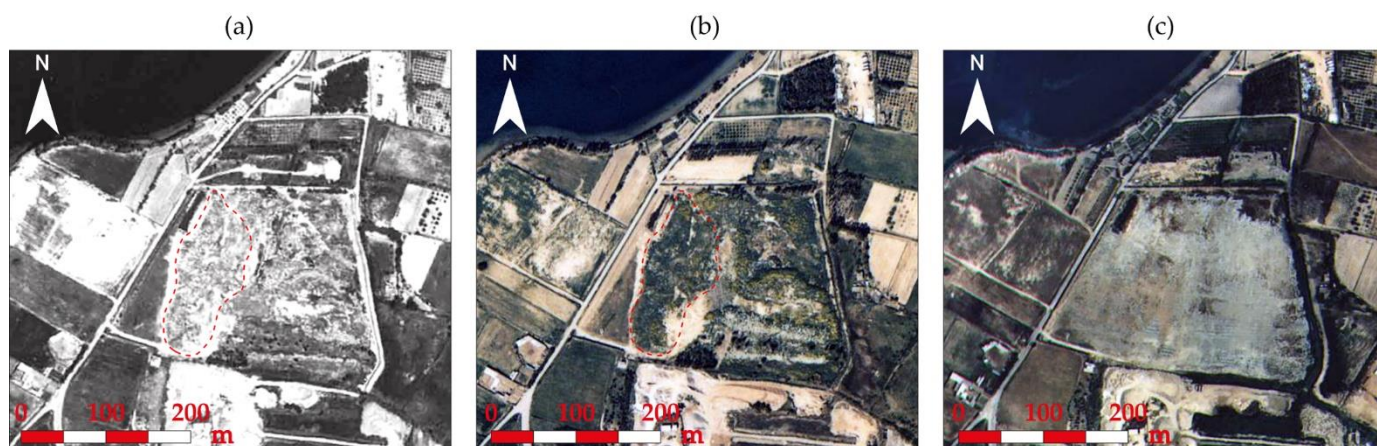

**Figure S1.** (a) Aerial photographs taken in (a) 1997, (b) 1998, and (c) 1999 (by courtesy of Regione Autonoma della Sardegna). Red curves show the location of a dump material.

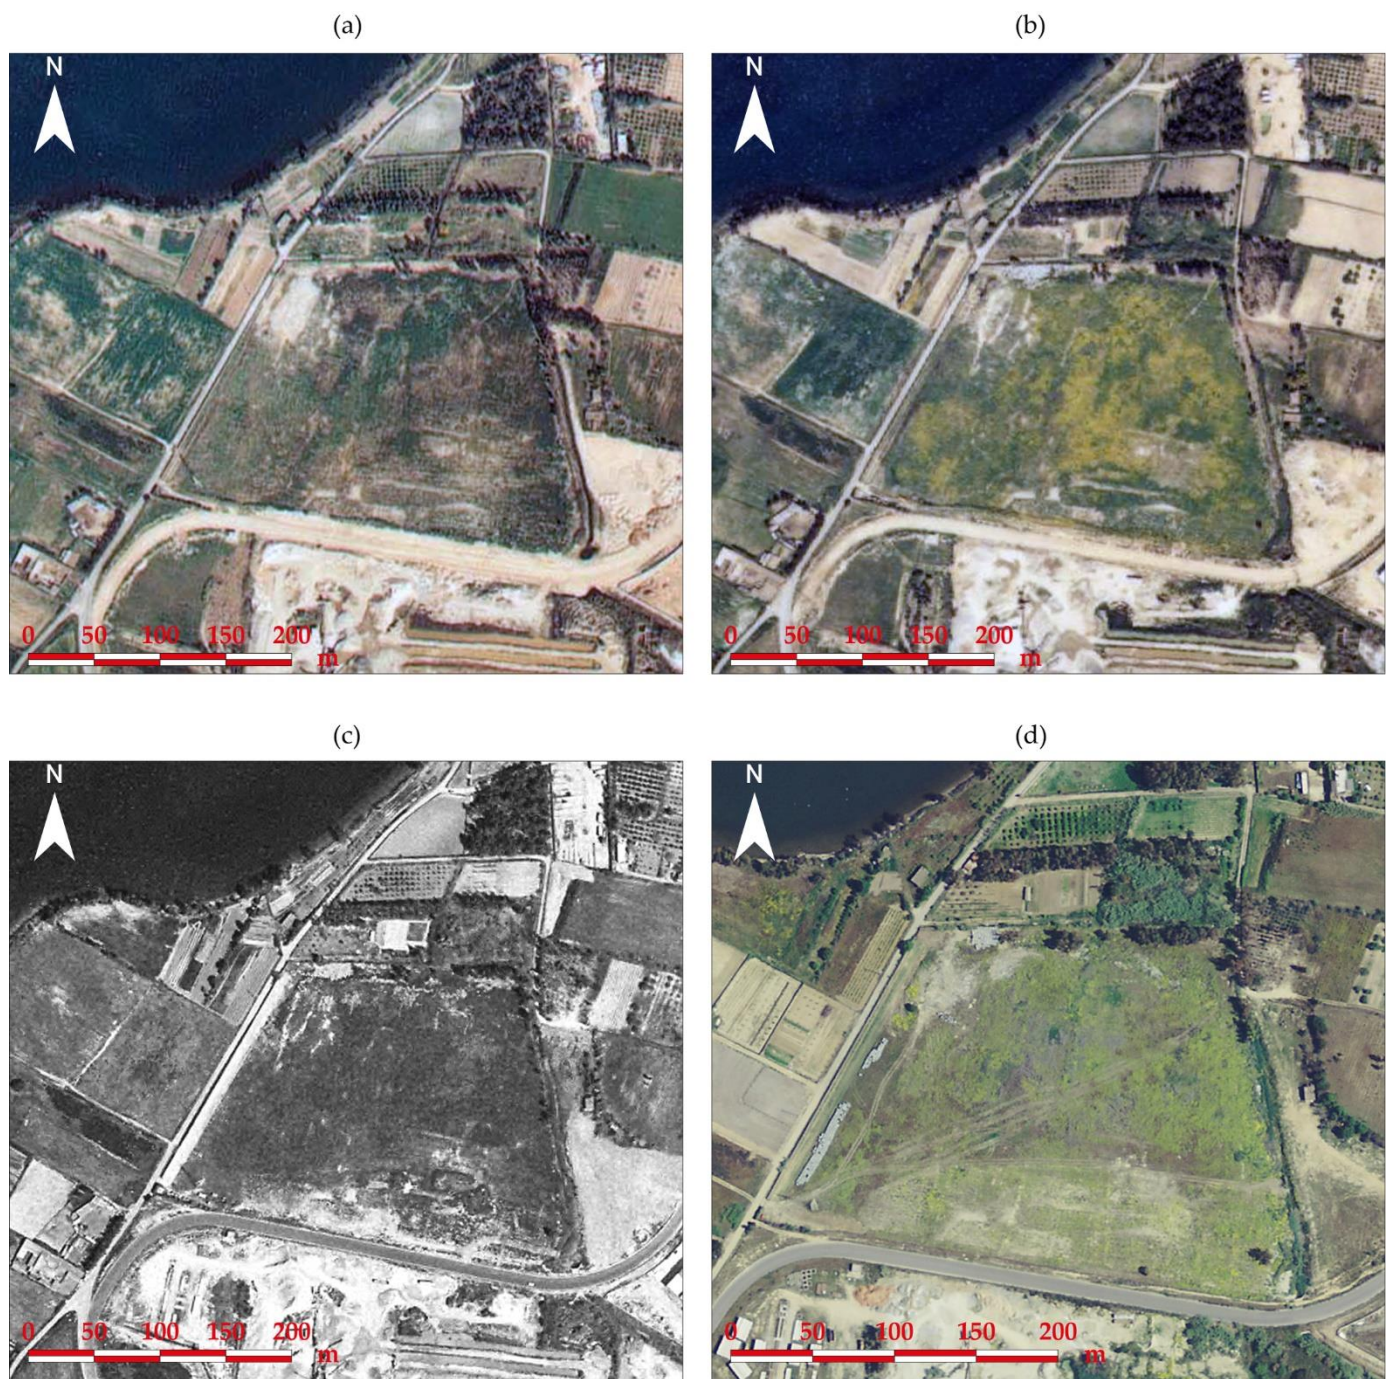

**Figure S2.** (a) Aerial photographs taken in (a) 2001, (b) 2002, (c) 2003, and (d) 2006 (by courtesy of Regione Autonoma della Sardegna).

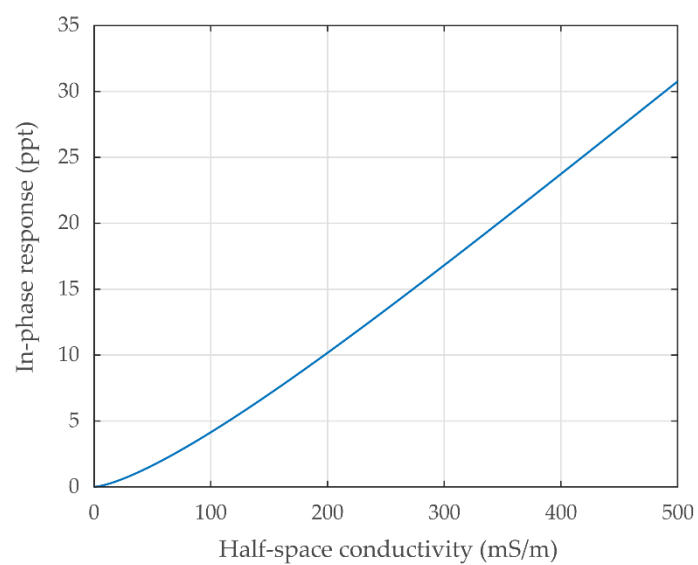

**Figure S3.** Simulated electromagnetic in-phase response of the EM31 for HCP configuration and with the coil elevation of 0.9 m over a range of half-space conductivities extending to 500 mS/m. Data was simulated considering a nonmagnetic half-space.
